# Supplementary material for: Gold(III) to Ruthenium(III) Metal Exchange in Dithiocarbamato Complexes Tunes Their Biological Mode of Action for Cytotoxicity in Cancer Cells
Source: MDPI journal article supplement (doi:10.3390/molecules26134073), 2021-07-03
Supplement: s1 [file s1]

# Supporting Information

## Synthesis, characterization and biological activity evaluation of Gold(III)- and Ruthenium(III)-dithiocarbamato complexes with anticancer properties

Maria Dalla Pozza<sup>1</sup>, Christophe Orvain<sup>2</sup>, Leonardo Brustolin<sup>1</sup>, Chiara Nardon<sup>1</sup>, Nicolò Pettenuzzo<sup>1</sup>, Christian Gaiddon<sup>2\*</sup>, Dolores Fregona<sup>1\*</sup>

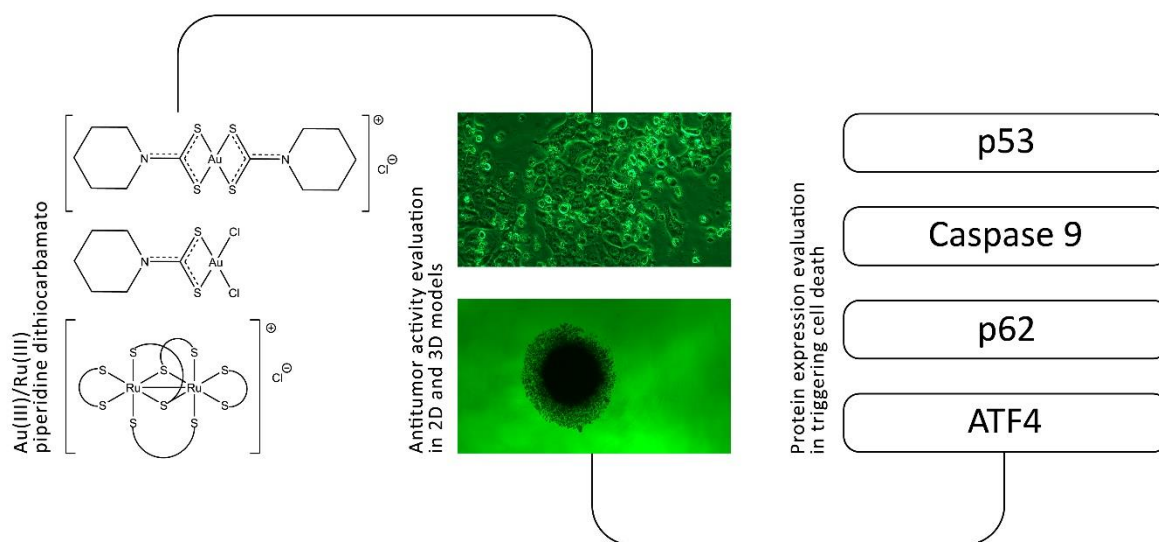

### TABLE OF CONTENTS

|                                                                                         |    |
|-----------------------------------------------------------------------------------------|----|
| Figure S1. 1H-NMR spectrum of [Ru(pipeDTC)3]                                            | S3 |
| Figure S2. 1H-NMR spectrum of [Ru2(pipeDTC)5]Cl                                         | S3 |
| Figure S3. 1H-NMR spectrum of [AuCl2(pipeDTC)] with 1 equivalent of dimethylsulfide     | S4 |
| Figure S4. 1H-NMR spectrum of [Au(pipeDTC)2]Cl with 1 equivalent of dimethylsulfide.    | S4 |
| Figure S5. 1H-NMR spectrum of [Ru2(pipeDTC)5]Cl with 1 equivalent of dimethylsulfide.   | S5 |
| Figure S6. 1H-NMR spectrum of [AuCl2(pipeDTC)] with 2 equivalents of 1-methylimidazole  | S5 |
| Figure S7. 1H-NMR spectrum of [Au(pipeDTC)2]Cl with 2 equivalents of 1-methylimidazole  | S6 |
| Figure S8. 1H-NMR spectrum of [Ru2(pipeDTC)5]Cl with 2 equivalents of 1-methylimidazole | S6 |
| Figure S9. 1H-NMR spectrum of [AuCl2(pipeDTC)] with 2 equivalents of 1-propanethiol.    | S7 |
| Figure S10. 1H-NMR spectrum of [Au(pipeDTC)2]Cl with 2 equivalents of 1-propanethiol    | S7 |

Figure S11.  $^1\text{H}$ -NMR spectrum of  $[\text{Ru}_2(\text{pipeDTC})_5]\text{Cl}$  with 2 equivalents of 1-propanethiol.

S8

Synthesis of Cisplatin

S8

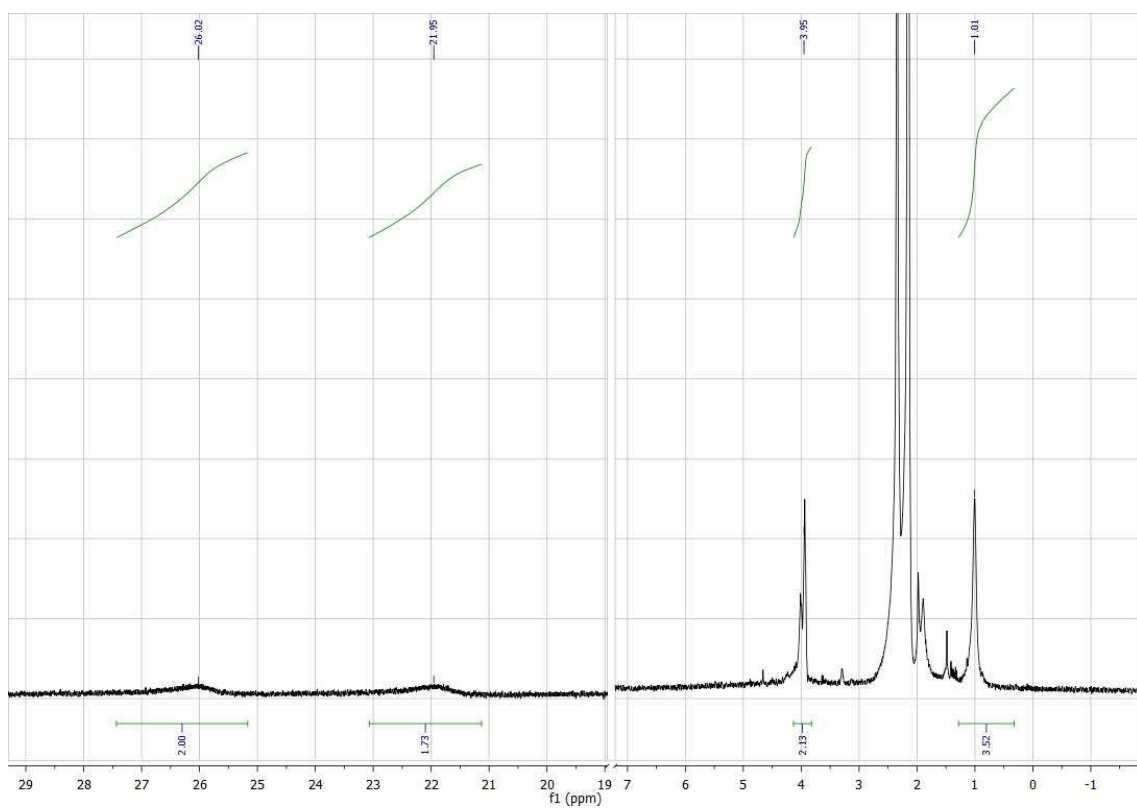

**Figure S1:**  $^1\text{H}$ -NMR spectrum of  $[\text{Ru}(\text{pipeDTC})_3]$

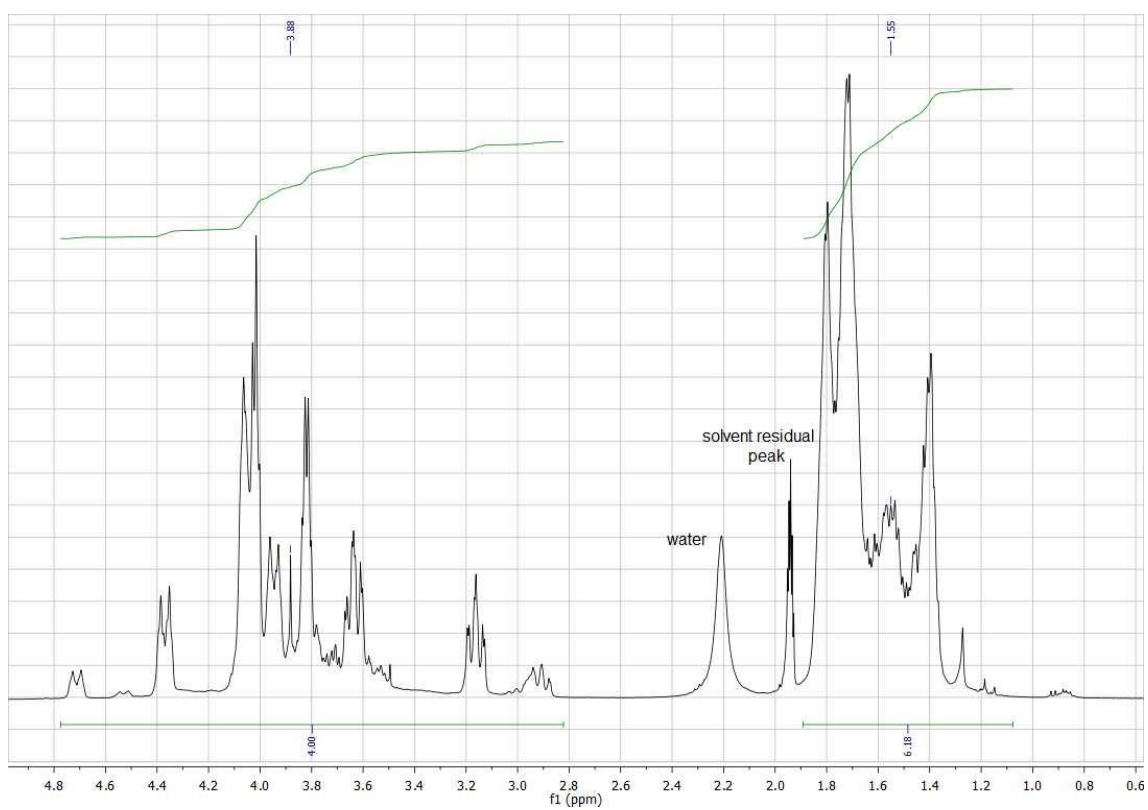

**Figure S2:**  $^1\text{H}$ -NMR spectrum of  $[\text{Ru}_2(\text{pipeDTC})_5]\text{Cl}$

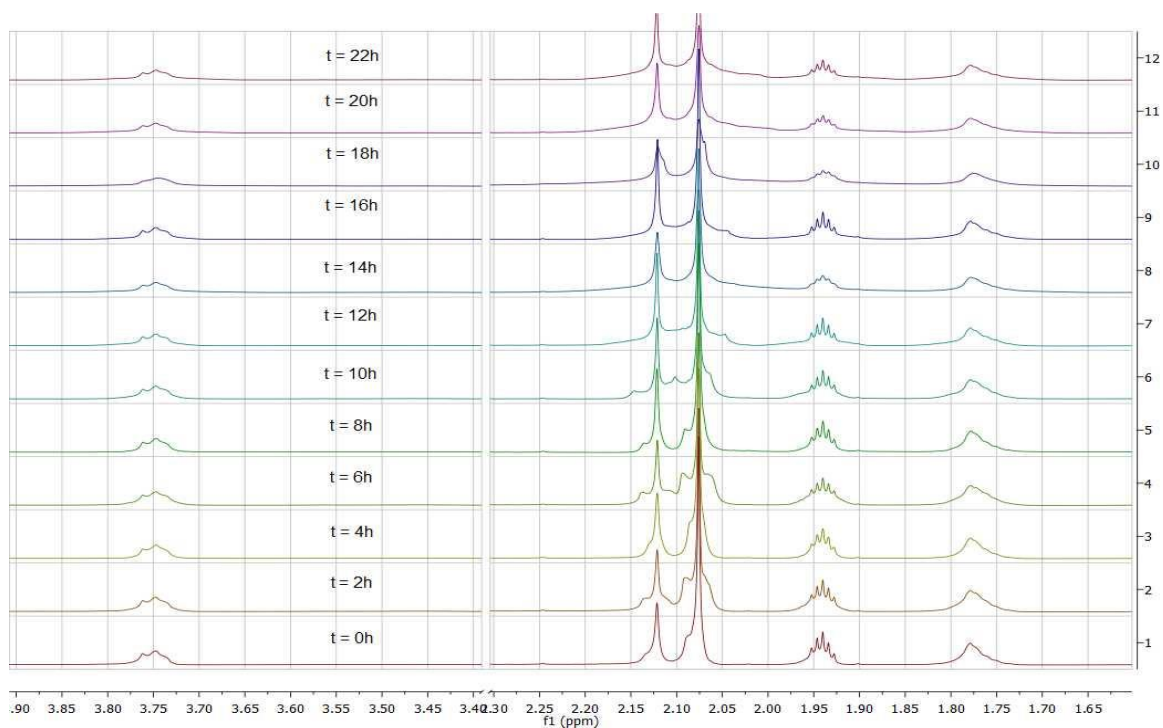

**Figure S3:**  $^1\text{H}$ -NMR spectrum of  $[\text{AuCl}_2(\text{pipeDTC})]$  with the addition of 1 equivalent of dimethylsulfide. The spectrum was recorded at 310 K in  $\text{CD}_3\text{CN}$ .

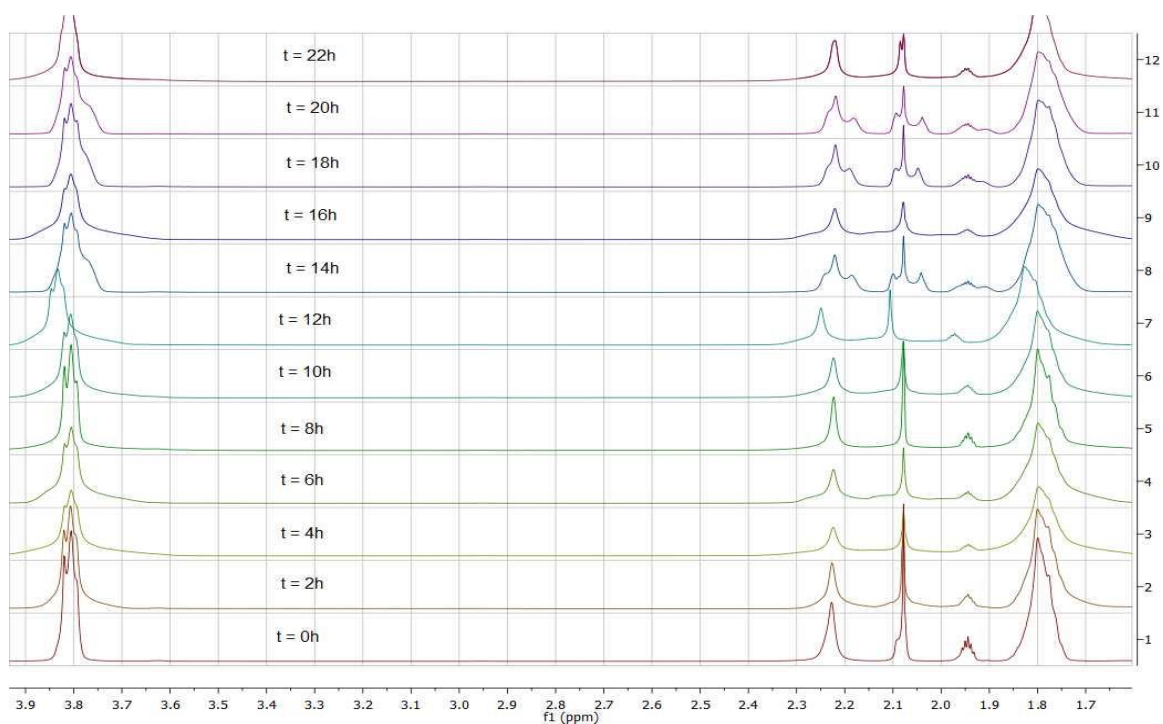

**Figure S4:**  $^1\text{H}$ -NMR spectrum of  $[\text{Au}(\text{pipeDTC})_2]\text{Cl}$  with the addition of 1 equivalent of dimethylsulfide. The spectrum was recorded at 310 K in  $\text{CD}_3\text{CN}$ .

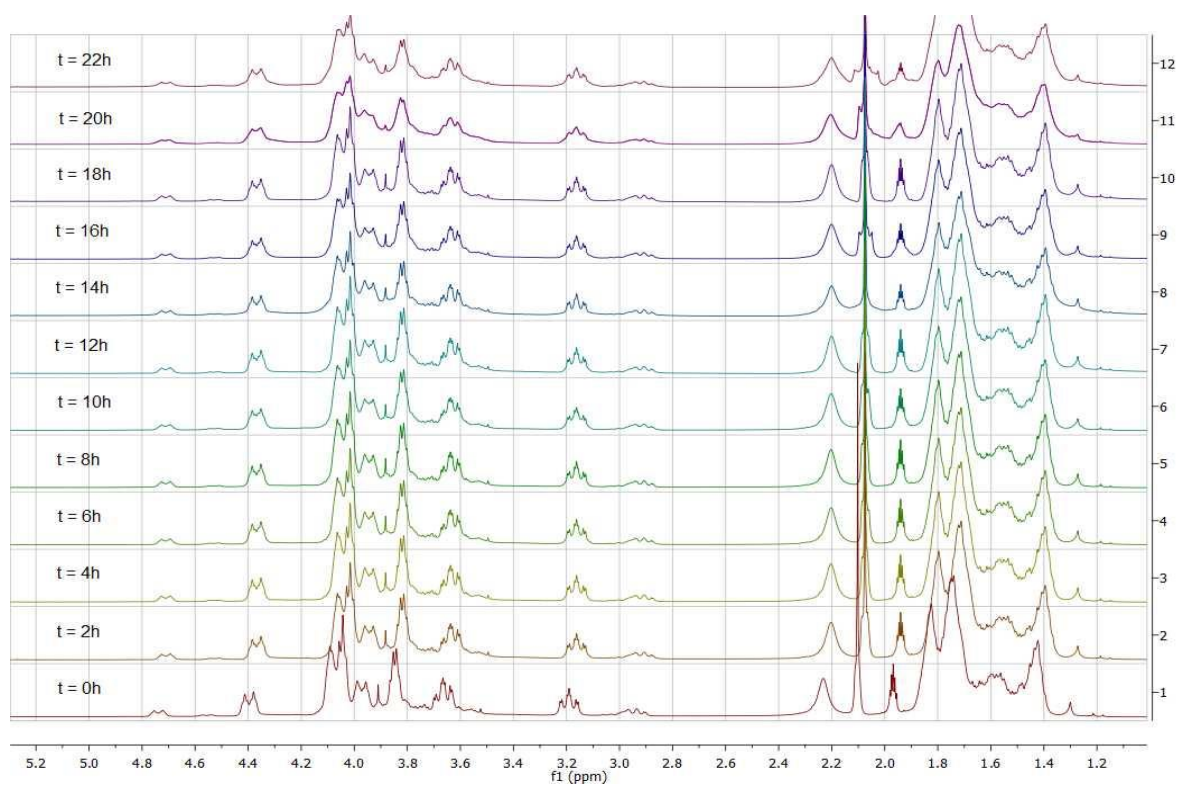

**Figure S5:**  $^1\text{H}$ -NMR spectrum of  $[\text{Ru}_2(\text{pipeDTC})_5]\text{Cl}$  with the addition of 1 equivalent of dimethylsulfide. The spectrum was recorded at 310 K in  $\text{CD}_3\text{CN}$ .

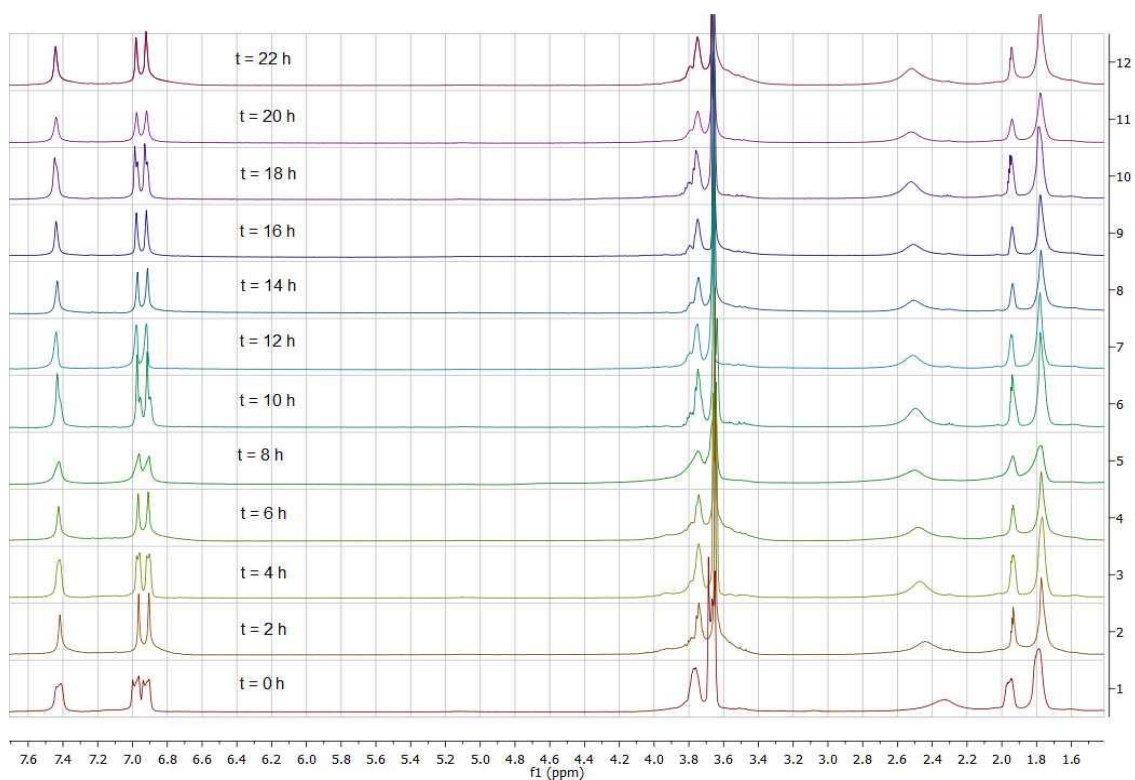

**Figure S6:**  $^1\text{H}$ -NMR spectrum of  $[\text{AuCl}_2(\text{pipeDTC})]$  with the addition of 2 equivalents of 1-methylimidazole. The spectrum was recorded at 310 K in  $\text{CD}_3\text{CN}$ .

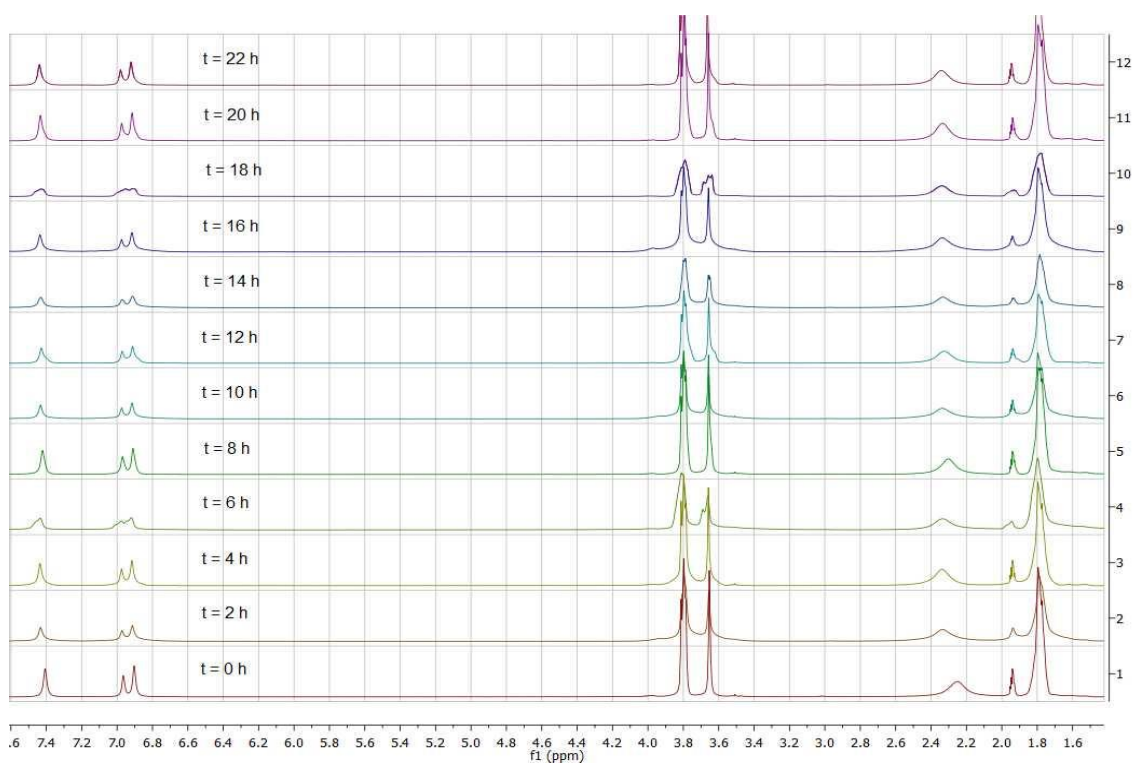

**Figure S7:**  $^1\text{H}$ -NMR spectrum of  $[\text{Au}(\text{pipeDTC})_2]\text{Cl}$  with the addition of 2 equivalents of 1-methylimidazole. The spectrum was recorded at 310 K in  $\text{CD}_3\text{CN}$ .

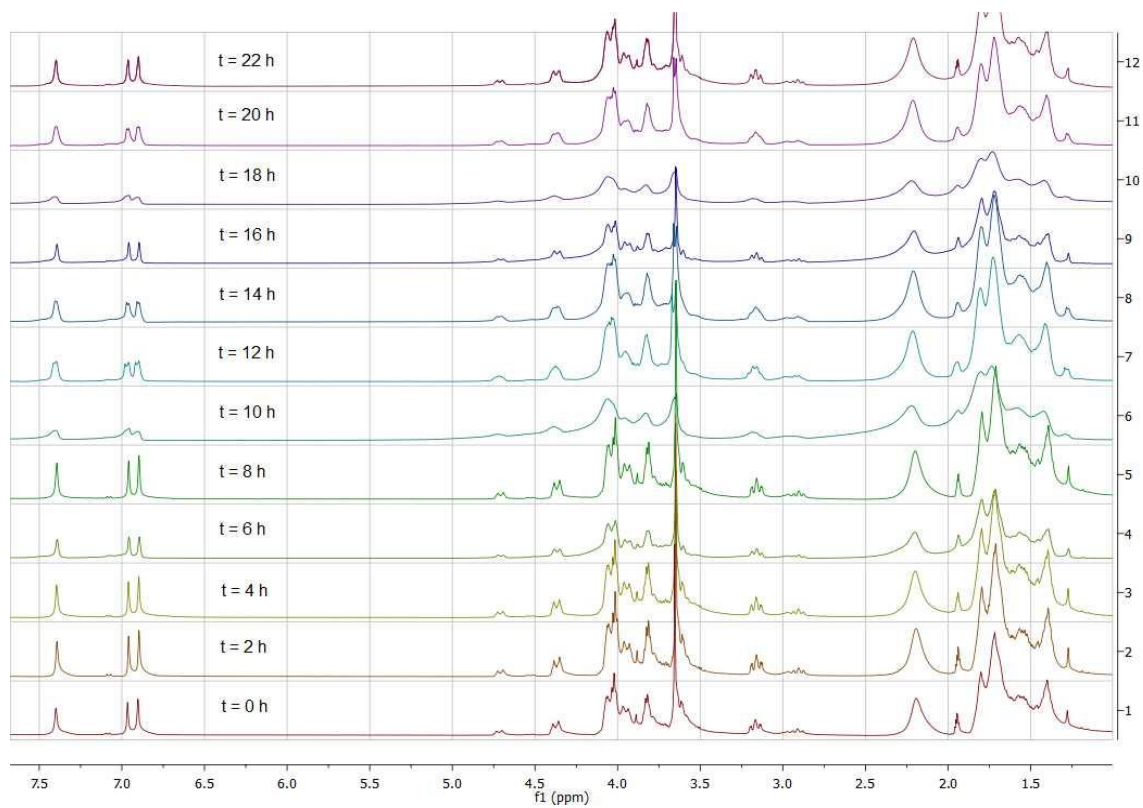

**Figure S8:**  $^1\text{H}$ -NMR spectrum of  $[\text{Ru}_2(\text{pipeDTC})_5]\text{Cl}$  with the addition of 2 equivalents of 1-methylimidazole. The spectrum was recorded at 310 K in  $\text{CD}_3\text{CN}$ .



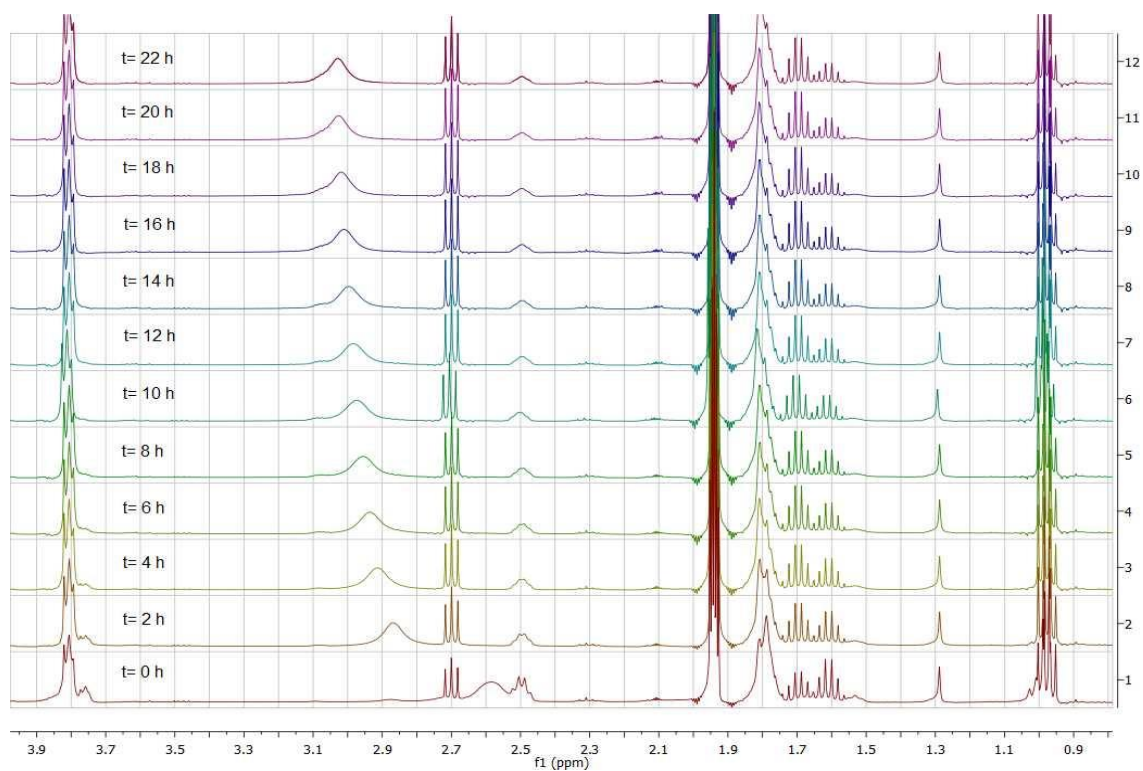

**Figure S9:**  $^1\text{H}$ -NMR spectrum of  $[\text{AuCl}_2(\text{pipeDTC})]$  with the addition of 2 equivalents of 1-propanethiol. The spectrum was recorded at 310 K in  $\text{CD}_3\text{CN}$ .

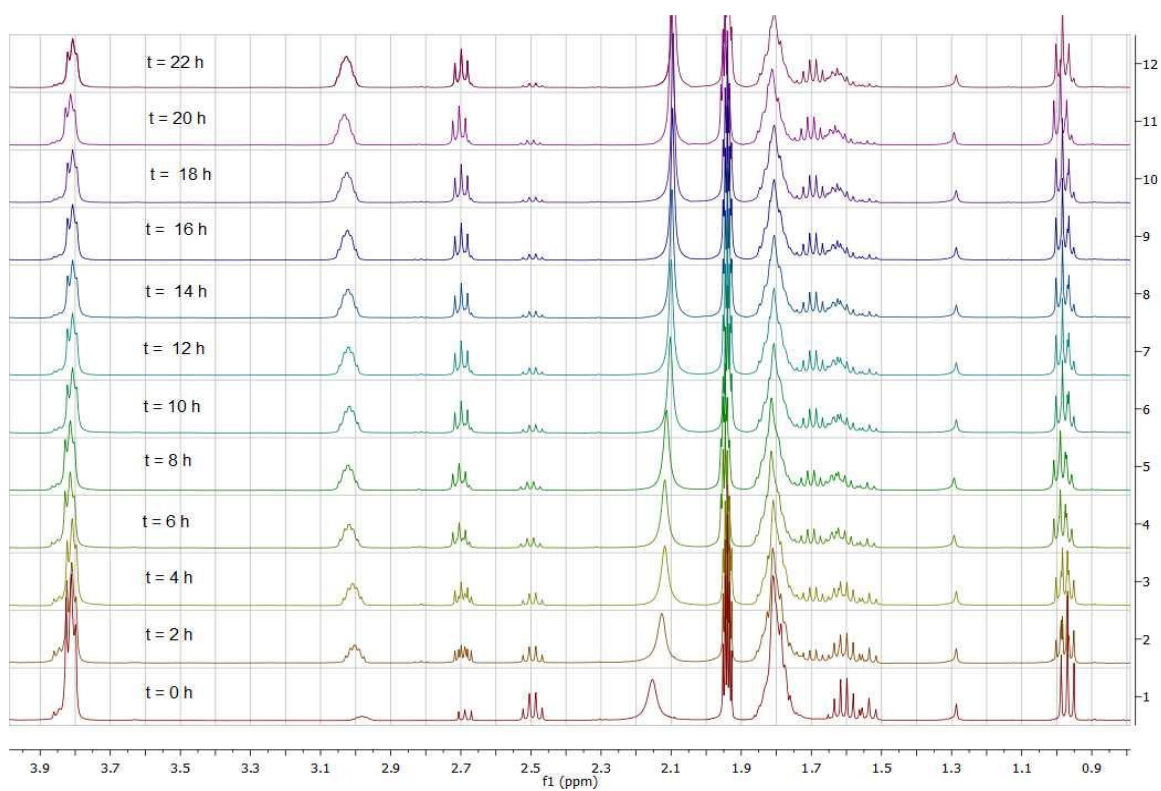

**Figure S10:**  $^1\text{H}$ -NMR spectrum of  $[\text{Au}(\text{pipeDTC})_2]\text{Cl}$  with the addition of 2 equivalents of 1-propanethiol. The spectrum was recorded at 310 K in  $\text{CD}_3\text{CN}$ .

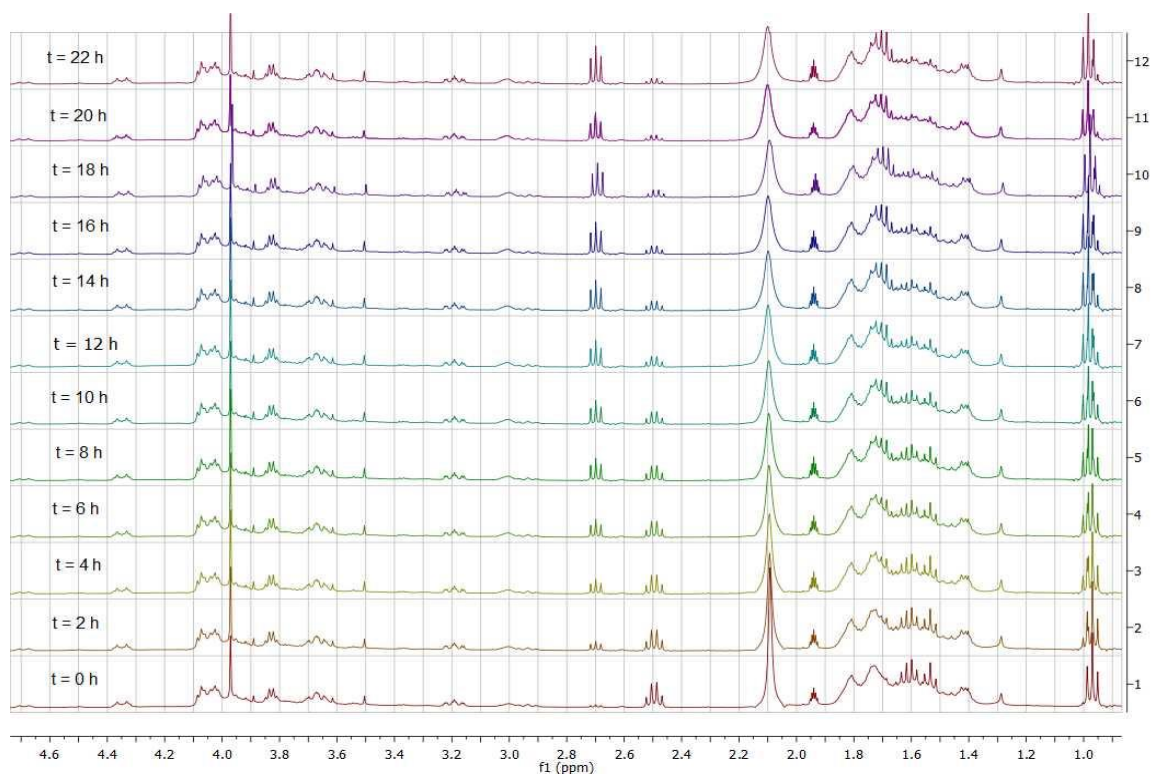

**Figure S11:**  $^1\text{H}$ -NMR spectrum of  $[\text{Ru}_2(\text{pipeDTC})_5]\text{Cl}$  with the addition of 2 equivalents of 1-propanethiol. The spectrum was recorded at 310 K in  $\text{CD}_3\text{CN}$ .

### Synthesis of Cisplatin

A solution of  $\text{K}_2[\text{PtCl}_4]$  (506.2 mg, 1.22 mmol) in 8 mL of deionized water was mixed with KI (1.635 g, 9.84 mmol) under stirring at room temperature for 30 minutes. Successively, after addition of concentrated  $\text{NH}_4\text{OH}$  (2.44 mmol, 320  $\mu\text{L}$ ), the formation of a yellow precipitate of  $\text{cis}[\text{PtI}_2(\text{NH}_3)_2]$  was observed. The solid was centrifuged and washed with 2x 3 mL of cold deionized water and then with 2x 3 mL of cold EtOH and dried under vacuum. After 24 hours, the di-iodo Pt(II) complex (1.03 mmol, 500 mg) was dissolved in deionized water (8 mL) and treated with  $\text{AgNO}_3$  (2.07 mmol, 351.7 mg). The mixture was stirred at  $55^\circ\text{C}$  overnight, then it was filtered to remove AgI and the obtained colourless solution was added of NaCl (4.12 mmol, 244 mg) under stirring. After 30 minutes, a yellow precipitate was formed. The solution was cooled at  $4^\circ\text{C}$  and the precipitate was separated, washed with cool water and dried in vacuum in the presence of  $\text{P}_2\text{O}_5$ . Aspect: yellow solid. Yield: 87%. Anal. Calc.  $\text{Pt N}_2\text{H}_6\text{Cl}_2$  (MW= 300.05 g/mol): H 2.00; N 9.33. Found: H 2.08; N 9.46.  $^1\text{H}$ -NMR (DMF, 300.13 MHz):  $\delta$  (ppm): 4.16 (broad s, 6H,  $\text{NH}_3$ ).
